# Supplementary material for: Both TALENs and CRISPR/Cas9 directly target the HBB IVS2–654 (C > T) mutation in β-thalassemia-derived iPSCs
Source: PubMed Central journal article supplement (PMC4496796; doi:10.1038/srep12065), 2015-07-09
Supplement: srep12065-s1.pdf [file srep12065-s1.pdf]

**Both TALENs and CRISPR/Cas9 directly target the *HBB*  
IVS2-654 (C>T) mutation in  $\beta$ -thalassemia-derived  
iPSCs**

Peng Xu<sup>1,2#</sup>, Ying Tong<sup>1,2#</sup>, Xiu-zhen Liu<sup>1,2</sup>, Ting-ting Wang<sup>1,2</sup>, Li Cheng<sup>1,3</sup>,  
Bo-yu Wang<sup>1,2</sup>, Xiang Lv<sup>1,2</sup>, Yue Huang<sup>1,3</sup>, De-pei Liu<sup>1,2\*</sup>

<sup>1</sup>*State Key Laboratory of Medical Molecular Biology, Institute of Basic Medical Sciences, Chinese Academy of Medical Sciences and Peking Union Medical College, Beijing, China*

<sup>2</sup>*Department of Biochemistry and Molecular Biology, Institute of Basic Medical Sciences, Chinese Academy of Medical Sciences and Peking Union Medical College, Beijing, China*

<sup>3</sup>*Department of Medical Genetics, Institute of Basic Medical Sciences, Chinese Academy of Medical Sciences, School of Basic Medicine Peking Union Medical College, Beijing, China*

# These authors contributed equally to this study

**\*Correspondence:** De-pei Liu, PhD, State Key Laboratory of Medical Molecular Biology, Institute of Basic Medical Sciences, Chinese Academy of Medical Sciences and Peking Union Medical College, 5 Dong Dan San Tiao, Beijing 100005, P.R. China. Telephone: 86-10-69156415; Fax: 86-10-69153086; Email: liudp@pumc.edu.cn

**Supplementary information** are as follows:

Figure S1. TALENs, CRISPR/Cas9 and piggyBac donor vector construction.

Figure S2. PCR identification of TALEN- and CRISPR/Cas9-mediated gene targeting in 654-hiPSC.

Figure S3. Human stem cell morphology of  $\beta$ -thalassemia patient-derived iPSCs.

Figure S4. Morphology change upon hematopoietic differentiation in OP9 co-culture.

Figure S5. Full-length gels which have been cropped in the main text are presented.

Table S1. Primer sequence summary.

## Figure S1

### A.

TALEN-1- L-protein sequence: 960aa

MAPKKKRKVDYKDHGDKDHDIDYKDDDDKGTVDLRTLGYSSQQQEKIKPKVRSTVAQHHEALV  
GHGFTHAHIVALSQHPAALGTAVVKYQDMIAALPEATHEAIVGVGKQWSGARALEALLTVAGELRGPPLQ  
LDTGQLLKIARGGVTAVEAVHAWRNALTGAPLNLTPEQVVAIASNIGGKQALETVQRLLPVLCQAHGLTP  
DQVVVAIASNIGGKQALETVQRLLPVLCQAHGLTPDQVVVAIASHDGGKQALETVQRLLPVLCQAHGLTPAQ  
VVAIASNIGGKQALETVQRLLPVLCQAHGLTPDQVVVAIASNNGGKQALETVQRLLPVLCQAHGLTPDQVV  
AIASNGGGKQALETVQRLLPVLCQAHGLTPAQVVAIASNNGGKQALETVQRLLPVLCQAHGLTPDQVVAI  
ASNIGGKQALETVQRLLPVLCQAHGLTPDQVVVAIASNGGGKQALETVQRLLPVLCQAHGLTPAQVVAIAS  
NIGGKQALETVQRLLPVLCQAHGLTPDQVVVAIASNIGGKQALETVQRLLPVLCQAHGLTPDQVVVAIASNG  
GGKQALETVQRLLPVLCQAHGLTPAQVVAIASNGGGKQALETVQRLLPVLCQAHGLTPAQVVAIASNGG  
GKQALETVQRLLPVLCQAHGLTPAQVVAIASHDGGKQALETVQRLLPVLCQAHGLTPAQVVAIASNGGGR  
PALESIVAQLSRPDPALAALNDHLVALACLGGRPALDAVKKGLPHAPALIKRTNRRIPERTSHRVAGSQLVK  
SELEEKSELRHKLKYVPHEYIELIEIARNPTQDRILEMKVMEFFMKVYGYRGEHLGGSRKPDGAIYTVGSPID  
YGVIVDTKAYSGGYNLPIGQADAMQSYVEENQTRNKHINPNEWVKVYPSVTEFKFLVSGHFKGNYK  
AQLTRLNHITNCNGAVLSVEELLIGGEMIKAGTLTLEEVRKFNNGEINF\*

TALEN-1- R-protein sequence: 960aa

MAPKKKRKVDYKDHGDKDHDIDYKDDDDKGTVDLRTLGYSSQQQEKIKPKVRSTVAQHHEALV  
GHGFTHAHIVALSQHPAALGTAVVKYQDMIAALPEATHEAIVGVGKQWSGARALEALLTVAGELRGPPLQ  
LDTGQLLKIARGGVTAVEAVHAWRNALTGAPLNLTPEQVVAIASNIGGKQALETVQRLLPVLCQAHGLTP  
DQVVVAIASNGGGKQALETVQRLLPVLCQAHGLTPAQVVAIASNIGGKQALETVQRLLPVLCQAHGLTPDQ  
VVAIASNGGGKQALETVQRLLPVLCQAHGLTPAQVVAIASNNGGKQALETVQRLLPVLCQAHGLTPDQV  
VAIASHDGGKQALETVQRLLPVLCQAHGLTPAQVVAIASNIGGKQALETVQRLLPVLCQAHGLTPDQVVAI  
ASNNGGKQALETVQRLLPVLCQAHGLTPDQVVVAIASNIGGKQALETVQRLLPVLCQAHGLTPDQVVVAIAS  
NIGGKQALETVQRLLPVLCQAHGLTPDQVVVAIASNIGGKQALETVQRLLPVLCQAHGLTPDQVVVAIASNG  
GGKQALETVQRLLPVLCQAHGLTPAQVVAIASNIGGKQALETVQRLLPVLCQAHGLTPDQVVVAIASNGG  
KQALETVQRLLPVLCQAHGLTPAQVVAIASNGGGKQALETVQRLLPVLCQAHGLTPAQVVAIASNNGGKQ  
ALETVQRLLPVLCQAHGLTPDQVVVAIASHDGGRPALESIVAQLSRPDPALAALNDHLVALACLGGRPALDA  
VKKGLPHAPALIKRTNRRIPERTSHRVAGSQLVKSELEEKSELRHKLKYVPHEYIELIEIARNPTQDRILEMKV  
MEFFMKVYGYRGEHLGGSRKPDGAIYTVGSPIDYGVIVDTKAYSGGYNLPIGQAREMQRYVEENQTRNK  
HINPNEWVKVYPSVTEFKFLVSGHFKGNYKAQLTRLNHITNCNGAVLSVEELLIGGEMIKAGTLTLEEVR  
RKFNNGEINF\*

### B.

spCas9 protein sequence:1503aa

MDYKDHGDKDHDIDYKDDDDKMAPKKKRKVGIHGVPAAADKKYSIGLDIGTNSVGVAVITDEYKVPSSKFK  
VLGNTDRHSIKKNLIGALLFDSGETAEATRLKRTARRRYTRRNRCYLQEIFSNEMAKVDDSFHRLSEESFLVEED  
KKHERHPIFGNIVDEVAYHEKYPTIYHLRKKLVDSTDKADLRLIYLALAHMIKFRGHFLIEGDLNPDNSDVKLFIQ  
LVQTYNQLFEENPINASGVDAKAILSARLSKSRLENLIAQLPGEKKNGLFGNLIASLGLTPNFKSNFDLAEDAKL  
QLSKDTYDDDLNLLAQIGDQYADFLAAKNLSDAILLSDILRVNTEITKAPLSASMIKRYDEHHQDLTLLKALVR

QQLPEKYKEIFFDQSKNGYAGYIDGGASQEEFYKFIKPILEKMDGTEELLVKNREDLLRKQRTFDNGSIPHQIHL  
 GELHAILRRQEDFYFPLKDNREKIEKILTRIPYVVGPLARGNSRFAWMTRKSEETITPWNFEVVDKGASAQSF  
 ERMTNFDKNLPNEKVLPHKSLLEYFTVYNELTKVKYVTEGMRKPAFLSGEQKKAIVDLLFKTNRKVTVKQLKED  
 YFKKIECFDSVEISGVEDRFNASLGTYHDLKIIKDKDFLDNEENEDILEDIVLTLTLFEDREMIEERLKTYAHLFDDK  
 VMKQLKRRRYTGWGRLSRKLINGIRDKQSGKTILDFLKSDGFANRNFMQLIHDDSLTFKEDIQKAQVSGQGDSL  
 HEHIANLAGSPAIAKKGILQTVKVVDELVKVMGRHKPENIVIAMARENQTTQKGQKNSRERMKRIIEGKELGSQI  
 LKEHPVENTQLQNEKLYLYYLQNGRDMYVDQELDINRLSDYDVDHIVPQSFLKDDSIDNKVLTNRSDKNRKGSDN  
 VPSEEVVKKMKNYWRQLLNAKLITQRKFDNLTKAERGGSELKAGFIKRQLVETRQITKHVAQILDSRMNTKY  
 DENDKLIREVKVITLKSKLVSDFRKDFQFYKVRINNYHHAHDAYLNAVVGTAIKKYPKLESEFVYGDYKVVYDVR  
 KMIAKSEQEIGKATAKYFFYSNIMNFFKTEITLANGEIRKRPLIETNGETGEIVWDKGRDFATVRKVLSPQVNV  
 KKTEVQTGGFSKESILPKRNSDKLIARKDWDPKKYGGFDSPTVAYSVLVAKVEKGKSKKLKSVKELLGITIMERS  
 SFEKNPIDFLEAKGYKEVKKDLIIKPKYSLFEENGRKRMLASAGELQKGNELALPSKYVNFLYLASHYEKLGSP  
 EDNEQQLFVEQHKHYLDEIIEQISEFSKRVLADANLDKVL SAYNKHRDKPIREQAENIIHLFTLNLGAPAAFY  
 FDTTIDRKRYTSTKEVL DATLIHQSI TGLYETRIDLSQLGGDKRPAATK KAGQAKKKK.EFLELADQPRCLLVASHL  
 LFAPPPCLP.PWKVPLPLSFPNKMRLHRIV.VGVILFWGVGWGRTARGRIGKRIAGMLG

C.

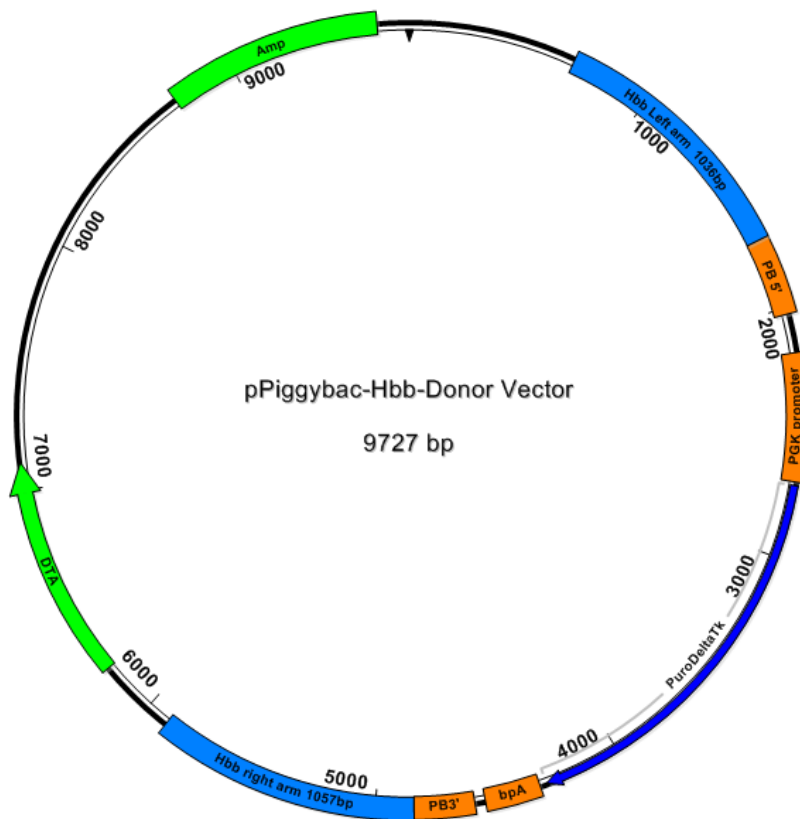

Figure S1 **TALENs, CRISPR/Cas9 and piggyBac donor vector construction**

- A. The amino acid sequences of TALEN-1 for targeting HBB IVS-2 654 loci
- B. The amino acid sequences of Cas9 from px330 for targeting HBB IVS-2 654 loci
- C. The vector map of piggyBac donor vector.

Figure S2

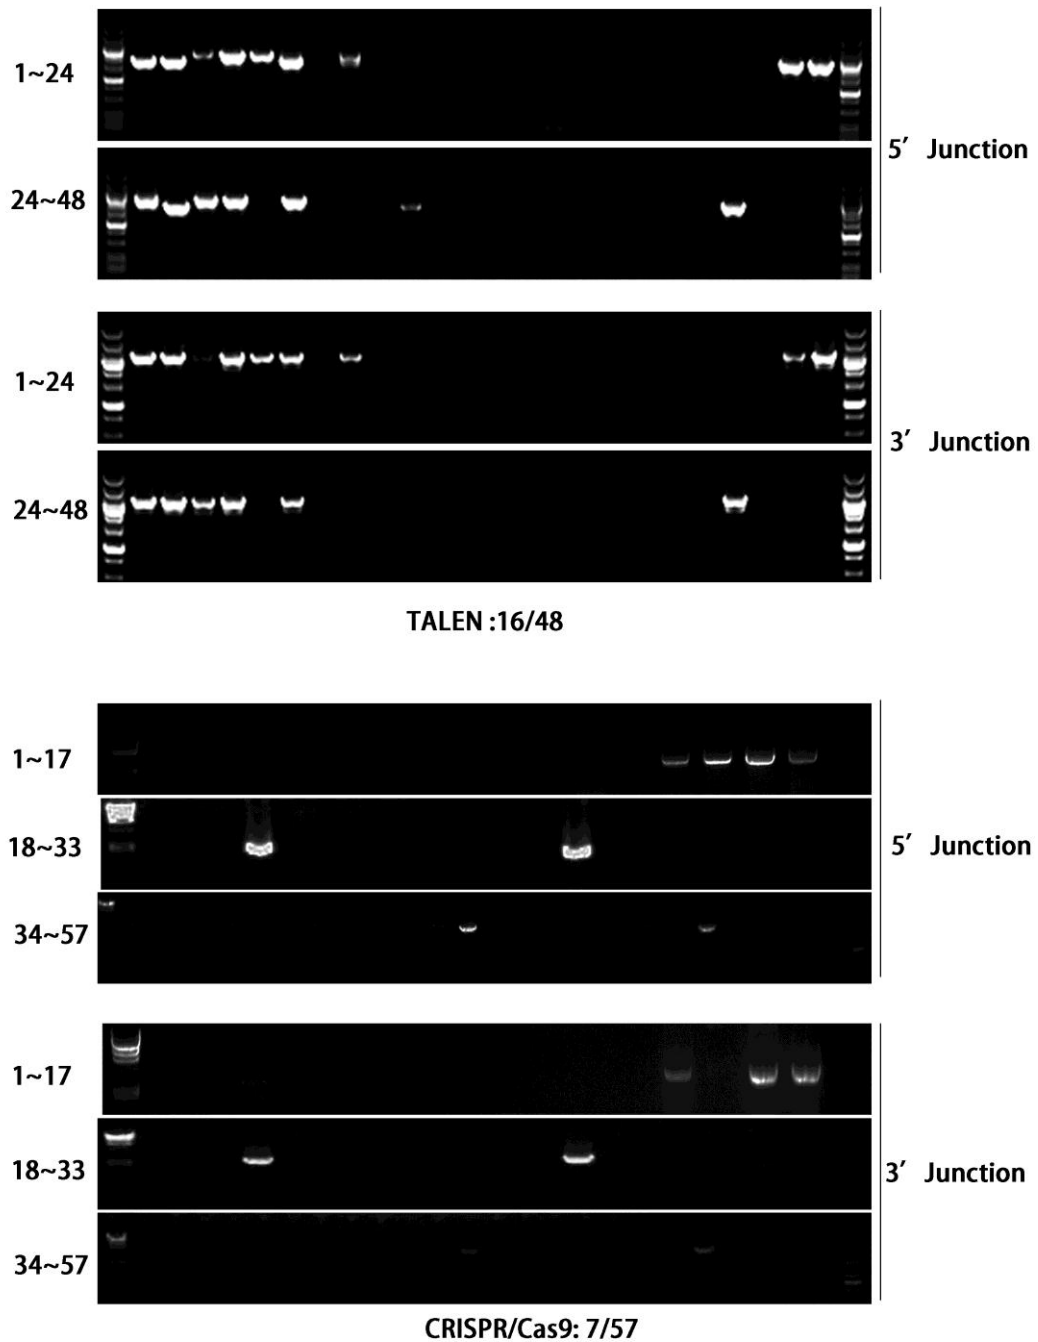

Figure S2 PCR identification of TALENs and CRISPR/Cas9 mediated gene targeting in 654hiPSC. After gene targeting, clones with correctly integrating into the HBB loci was selected by puromycin and further identified by 5' junction and 3' junction PCR primers. The upper lane showed the PCR gel results in TALEN targeted 48 cell clones; while the down lane showed the PCR results in CRISPR/Cas9 targeted 57 cell clones.

**Figure S3**

**A**

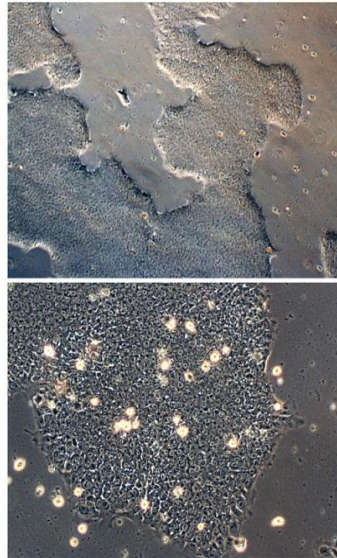

**B**

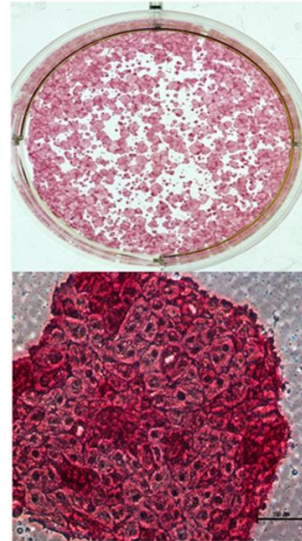

**Figure S3 Human pluripotent stem cell morphology of  $\beta$ -thalassemia patient derived iPSC**

- A. The morphology in bright field by respectively 50x (up) and 200x (down) in  $\beta$ -thalassemia iPSC cells
- B. AP (alkaline phosphatase) staining showed the typical human stem cell morphology by respectively 50x (up) and 200x(down) in  $\beta$ -thalassemia iPSC cells

**Figure S4**

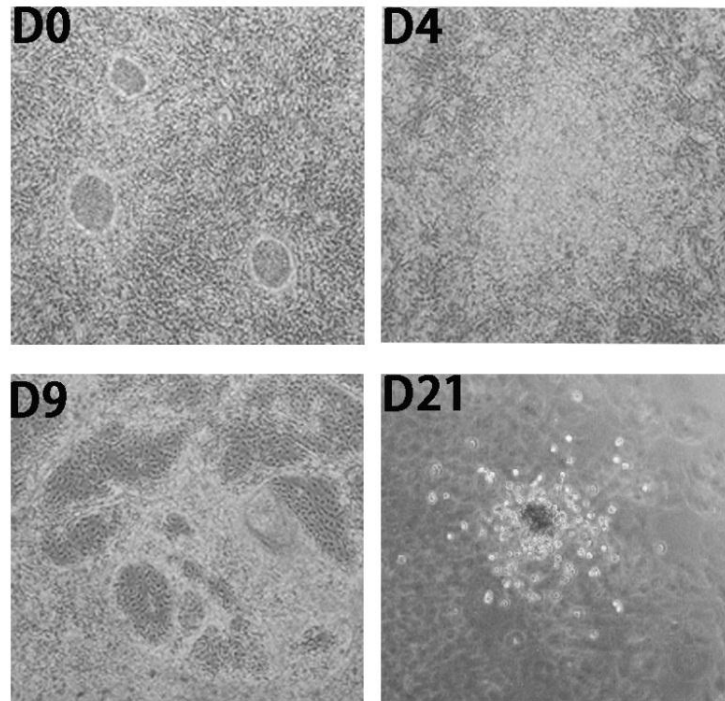

**Figure S4 Morphology change rapidly upon hematopoietic differentiation by using OP9 co-culture.** Human iPSCs were digested and cocultured with overgrown OP9; After 9 d of coculture, differentiated blood-forming hPSC colonies with radial sac-like structures are formed; upon hematopoietic differentiation at D21, the cell showed erythroid progenitor morphology (D represents day).

Figure S5

A

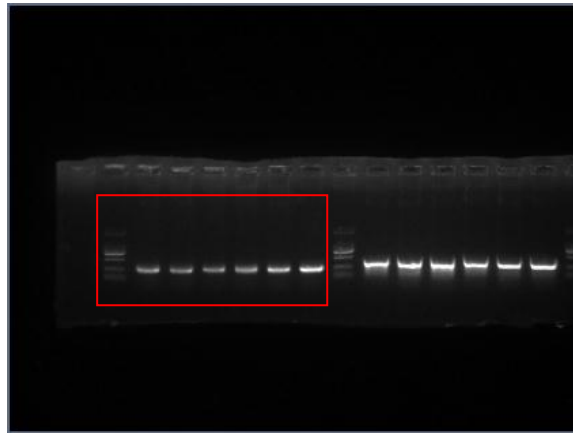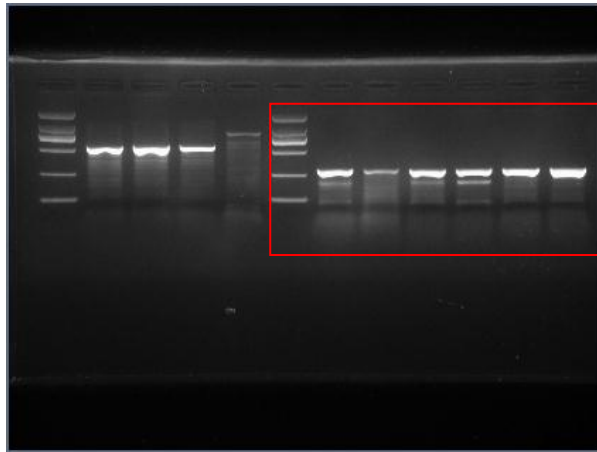

B

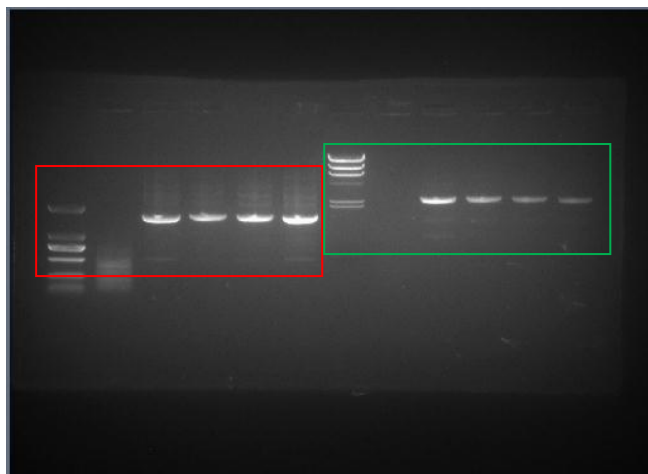



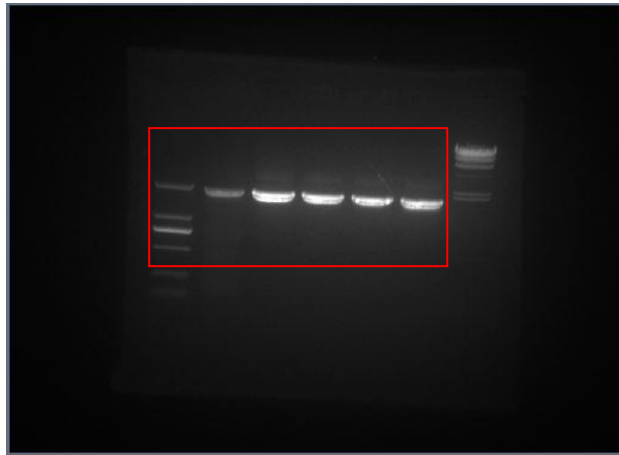

C

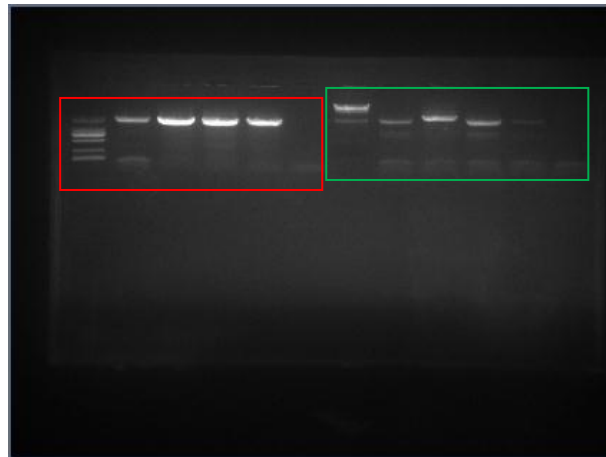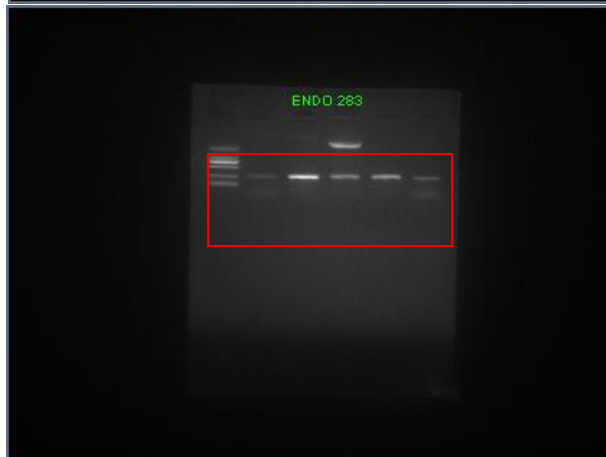

D

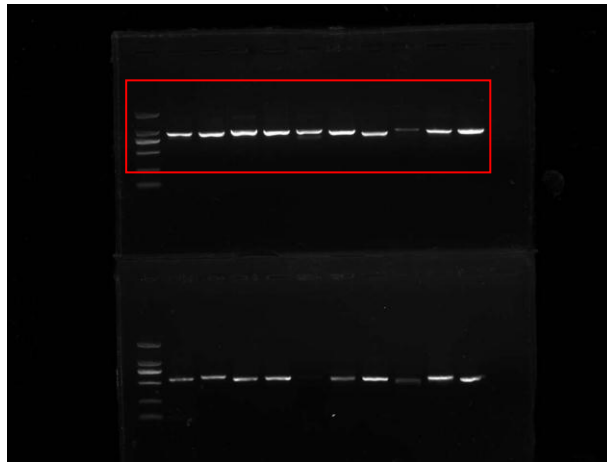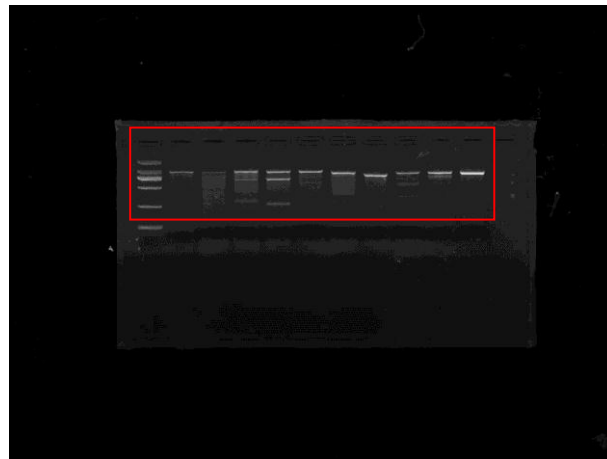

E

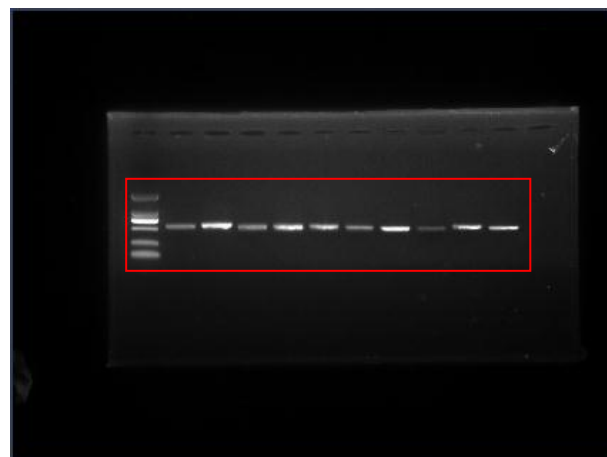

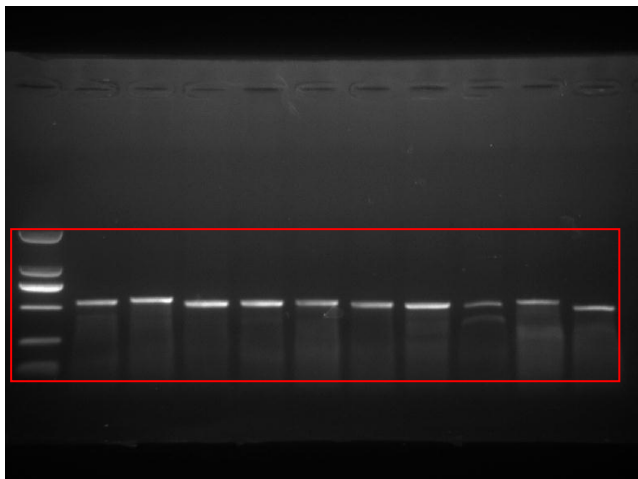

F

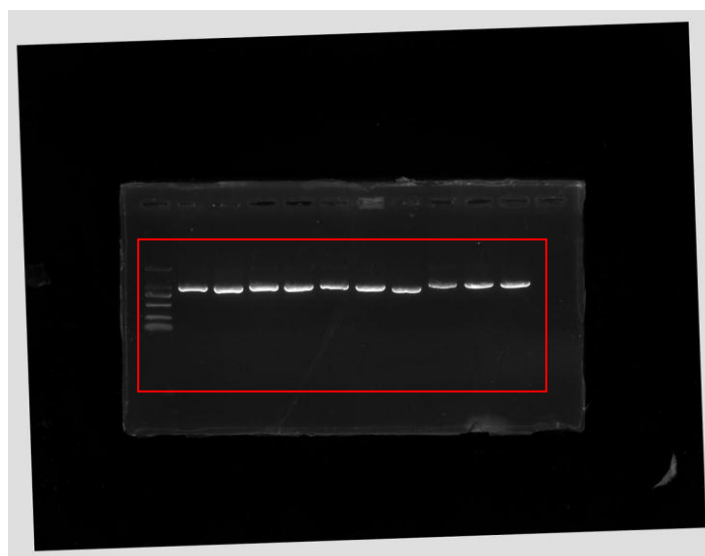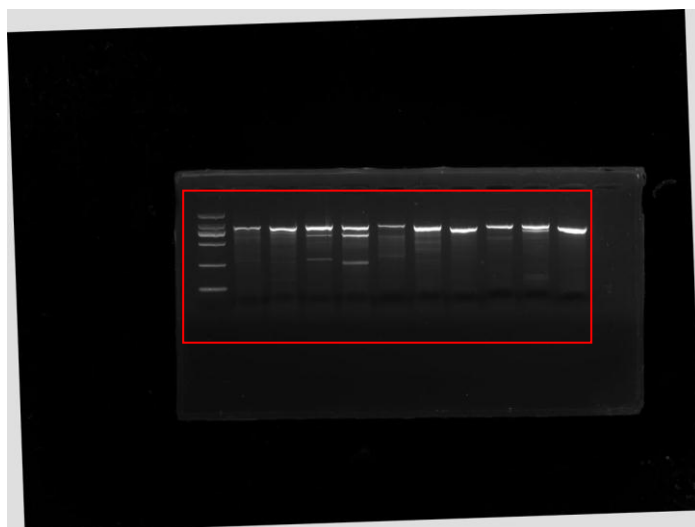

**G**

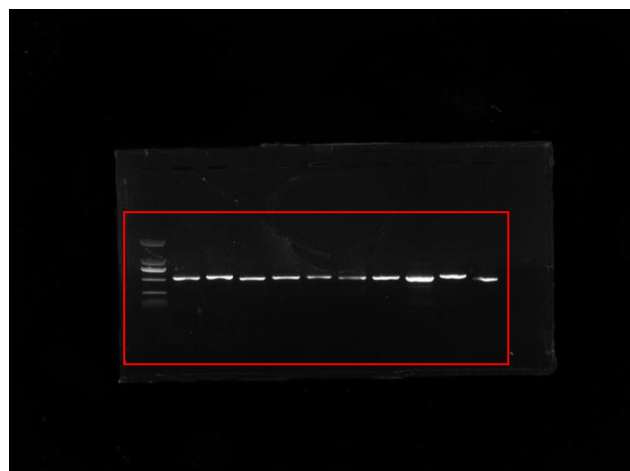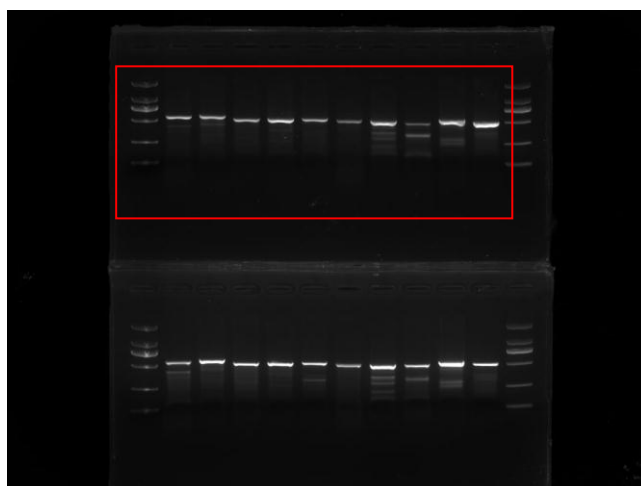

**H**

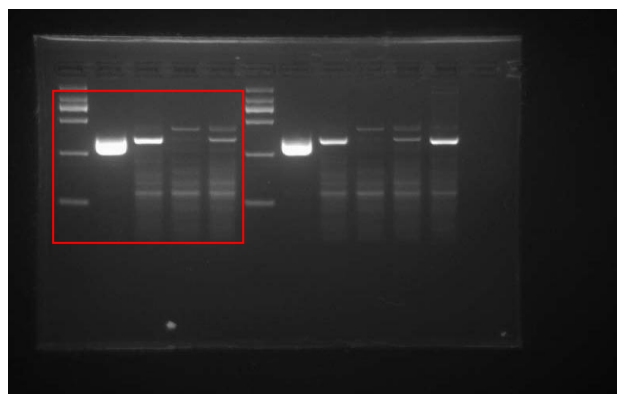

Figure S5 **Full-length gels which have been cropped in the main text are presented.**

A. PCR result in **Fig 1c** of the main text was in the upper pannel, red lines represent cropping lines;T7E1 result in Fig1c was in the down pannel,red lines represent cropping lines. All gels

have been run under the same experimental conditions.

- B. **Fig 2c** in the main text was shown here. 5' Junction PCR (red lines) and 3' Junction PCR results (green lines) are respectively cropped from the upper panel, and the Hbb endogenous gene control PCR (1700bp) result (red lines) was cropped from the down panel. All the gels have been run under the same experimental conditions.
- C. **Fig 2d** in the main text was shown here. 5' Junction PCR (red lines) and 3' Junction PCR results (green lines) are respectively cropped from the upper panel, and the Hbb endogenous gene control PCR (2830bp) result (red lines) was cropped from the down panel. All the gels have been run under the same experimental conditions.
- D. PCR result in **Fig 3a** of the main text was in the upper panel, red lines represent cropping lines; T7E1 result in **Fig 3a** was in the down panel, red lines represent cropping lines. All gels have been run under the same experimental conditions.
- E. PCR result in **Fig 3b** of the main text was in the upper panel, red lines represent cropping lines; T7E1 result in **Fig 3b** was in the down panel, red lines represent cropping lines. All gels have been run under the same experimental conditions.
- F. PCR result in **Fig 3c** of the main text was in the upper panel, red lines represent cropping lines; T7E1 result in **Fig 3c** was in the down panel, red lines represent cropping lines. All gels have been run under the same experimental conditions.
- G. PCR result in **Fig 3d** of the main text was in the upper panel, red lines represent cropping lines; T7E1 result in **Fig 3d** was in the down panel, red lines represent cropping lines. All gels have been run under the same experimental conditions.
- H. PCR result in **Fig 5c** of the main text was shown here, the red lines represent the cropping lines.

## TABLES

**Table 1.** The top 10 potential off-target sites of TALENs for the recognition of HBB IVS-2 654 loci.

| Serial number | Gene name | TAL 1 Target       | TAL 2 Target       | Spacer Length |
|---------------|-----------|--------------------|--------------------|---------------|
| on target     | HBB       | T ATATGCAGAGATATT  | T AACAGTGATAATTTCT | 16            |
| Site-1        | C4orf21   | T AAAAAAAGAAAAATT  | T ATATACAAAAATATT  | 20            |
| Site-2        | TLL7      | T AGATGCAAAAATCCT  | T ATATCCACAAATATT  | 25            |
| Site-3        | TEX41     | T GAAAATCATAATCTCT | T AAATACAGAAATATT  | 18            |
| Site-4        | EGFR      | T ATATGTACAAATAAA  | T ATATACAAAAATATA  | 22            |
| Site-5        | CTNNA3    | T ATATGCCGAAATATT  | T AAAACTAATCACTTCT | 25            |
| Site-6        | SMEK2     | T ATATACATAAATATT  | T TACAATGCTAATTTAT | 25            |
| Site-7        | PTPRD     | T ATATACAAACATATT  | T ATATGCACATATATG  | 20            |
| Site-8        | GPR98     | T AACAAATAAATCTCT  | T ATATACACACTCATT  | 26            |
| Site-9        | SLC9A6    | T ATATGTAGATATATA  | T ATATGCAGAAATATG  | 30            |
| Site-10       | TTC28     | T ATATGCAGAAATATG  | T AATAGATATAACTTCT | 25            |

**Table 2.** The top 10 potential off-target sites of CRISPR/Cas9 for the recognition of HBB IVS-2 654 loci. Lowercase nucleotides represent a mismatch compared with the on-target sequences.

| Serial number | Gene name | Sequence                | Orientation | No. of mismatches |
|---------------|-----------|-------------------------|-------------|-------------------|
| on target     | HBB       | CAGTGATAATTTCTGGGTTAAGG | -           | 0                 |
| Site-1        | HHAT      | CAGTGATtATTCTGGGTTATGG  | -           | 1                 |
| Site-2        | NTRK2     | CAGTGATAATTTCaGGGgTATGG | +           | 2                 |
| Site-3        | ATXN10    | gAGTGATgATTCTGGGTTAAGG  | +           | 2                 |
| Site-4        | TPRG1     | CAGTGATtATTCTGGGgTgTGG  | +           | 3                 |
| Site-5        | EHF       | tAGTGATAgTTTCTGGGgAAGG  | +           | 3                 |
| Site-6        | CCDC178   | CtaTGATAATTTCTtGGTTAGGG | +           | 3                 |
| Site-7        | CDC7      | CAGTGtTAATTTCTGtTTATGG  | -           | 3                 |
| Site-8        | RNF216    | CAGTGActATTCTGGGtAAGGG  | +           | 3                 |
| Site-9        | CNTNAP2   | gAaTGATAcTTTCTGGGTTAGGG | -           | 3                 |
| Site-10       | C2orf73   | CAGTGgTAATTTCaGaGTTAAGG | -           | 3                 |

**Table S1**

Primer used for PCR and vector construction.

| Name               | Sequence(5'-3')                |
|--------------------|--------------------------------|
| HBB-Larm-F         | GAACGTGGATGAAGTTGGTGGTGAG      |
| HBB-Larm-R         | CCCAGAAATTATCACTGTTATTCTT      |
| HBB-Rarm-F         | GGCAATAGCAATATTTCTGCATATAA     |
| HBB-Rarm-R         | AGACTGTGAAAGAGTGATAGTTCCG      |
| 5' Junction-F      | AGAGTTTTTCATCCATTCTGTCCTG      |
| 5' Junction-R      | ACGTGCTACTTCCATTTGTCACGT       |
| 3' Junction-F      | AATCGCGAACATCTACACCACACAACACCG |
| 3' Junction-R      | AGAGAGGACAAGGACCACTTGAGACTCATA |
| HBB-Endo-F         | GTGAGTCTATGGGACGCTTGATGTT      |
| HBB-Endo-R         | CTGTGGGAGGAAGATAAGAGGTATG      |
| HBB-T7E1-F         | ATCTCTTTCTTTCAGGGCAATAATG      |
| HBB-T7E1-R         | TGGGAGGAAGATAAGAGGTATGAAC      |
| Puro $\Delta$ tk-F | GTCACCGAGCTGCAAGAACT           |
| Puro $\Delta$ tk-R | GCCCGAAACAGGGTAAATAA           |
| TALEN-OT1-F        | GAGATTACAGACTCCTGCCACTACG      |
| TALEN-OT1-R        | ACTCCATCTCAAAAAAAAAACAACA      |
| TALEN-OT2-F        | AGGTTTTTTTGTACCTGCTCTTTACG     |
| TALEN-OT2-R        | CTGAAAAAGAAATGTCCAGACCAAG      |
| TALEN-OT3-F        | TGTTTGAAACCAGGGAGAATAAATA      |
| TALEN-OT3-R        | ATACTTGCCATAAAAAGGTTTCGTT      |
| TALEN-OT4-F        | CTTTGACGATGAAAACATCAAGTTC      |
| TALEN-OT4-R        | TACGTATGAACAGTGCCAGTGATAC      |
| TALEN-OT5-F        | AGCTGAGATTAGAGTCCAAAGCTAA      |
| TALEN-OT5-R        | GGCTATTTTCATCTGTGACAACAAGA     |
| TALEN-OT6-F        | AGAATGGTCTCAAACCTGACCTC        |
| TALEN-OT6-R        | CTGGTCTCTAACTCCTGGGCTCAAC      |
| TALEN-OT7-F        | AGATGAAGCTAACATTTGAATTGGC      |
| TALEN-OT7-R        | AGTAAAAGACAGAACTCTGGTGGTG      |
| TALEN-OT8-F        | GAATGTAATTCCTGTGAATGGCAA       |
| TALEN-OT8-R        | ATCTAAAACCCTCATCTGTCAAGCT      |
| TALEN-OT9-F        | ACTCCCTGGAATAAAGATGCTTC        |
| TALEN-OT9-R        | ATGGGAACACTGGTTAACAATTCTG      |
| TALEN-OT10-F       | CCTGACTGAAGTGGATTTTTTGTTT      |
| TALEN-OT10-R       | TCTGGATGAGTGCCTGATCTTAGAT      |
| CRISPR/Cas9-OT1-F  | GCTGAGAGATAAAAGAGGAAAAAGA      |
| CRISPR/Cas9-OT1-R  | TTTTACTCAAATTGGAATAGCTGG       |
| CRISPR/Cas9-OT2-F  | TCATTTATGGATTATCTATGGCTGC      |
| CRISPR/Cas9-OT2-R  | TTTGTACACATAAGGTTTGGACACC      |



|                    |                             |
|--------------------|-----------------------------|
| CRISPR/Cas9-OT3-F  | GTTGCAGGGAAGAAGATAATTGACT   |
| CRISPR/Cas9-OT3-R  | AGACTATCCTTCATTAAATGATCCT   |
| CRISPR/Cas9-OT4-F  | GTATTGTTATGCTTTTAACCCACG    |
| CRISPR/Cas9-OT4-R  | ATGCCAGGATCCTTCTGTTATTCT    |
| CRISPR/Cas9-OT5-F  | AACTAACTCCCTGACACTTAAGGCC   |
| CRISPR/Cas9-OT5-R  | CTTTCAACCATTTCACACTGTAC     |
| CRISPR/Cas9-OT6-F  | AGTTTATGTTGTGTGGGATTTATGC   |
| CRISPR/Cas9-OT6-R  | AACAAGGGAATTAATTTTAGTGCC    |
| CRISPR/Cas9-OT7-F  | TCAAGTGATCCCCTCCTATCTTGCC   |
| CRISPR/Cas9-OT7-R  | GTTTCCTCTGTTTGGAATGCTCTTC   |
| CRISPR/Cas9-OT8-F  | AAATGAAAATAAGTGTGATACCATT   |
| CRISPR/Cas9-OT8-R  | CTATCCCCAGAGTTCAGTAGTTCTG   |
| CRISPR/Cas9-OT9-F  | TTATTATTGAAGGCCCAAAGTAACT   |
| CRISPR/Cas9-OT9-R  | TAGTGGCACACGCCTATAATCCTAC   |
| CRISPR/Cas9-OT10-F | TCTGTTGTCTGAGGATTTTTTCAGAT  |
| CRISPR/Cas9-OT10-R | TGGTGGACTCTAAGATTAAAGACCT   |
| HBBcDNA-F          | CCTGAGGAGAAGTCTGCCGTTACTGCC |
| HBBcDNA-R          | GCATTAGCCACACCAGCCACCACTT   |
| qHBB-F             | TCTGTCCA CTCTGATGCTGTTATG   |
| qHBB-R             | GTTGGACTTAGGGAACAAAGGAACC   |
